# Supplementary material for: Adjustment of Matrix Effects in Analysis of 36 Secondary Metabolites of Microbial and Plant Origin in Indoor Floor Dust Using Liquid Chromatography-Tandem Mass Spectrometry
Source: MDPI journal article supplement (doi:10.3390/buildings13051112), 2023-04-22
Supplement: s1 [file s1]

Archive with 1 entries (1 files):
- buildings-2327297-SI.pdf
